# Supplementary material for: Biobased Poly(ethylene furanoate) Polyester/TiO2 Supported Nanocomposites as Effective Photocatalysts for Anti-inflammatory/Analgesic Drugs
Source: MDPI journal article supplement (doi:10.3390/molecules24030564), 2019-02-04
Supplement: s1 [file s1]

Supplementary data: Biobased poly(ethylene furanoate) polyester/TiO<sub>2</sub> supported nanocomposites as effective photocatalysts for anti-inflammatory/analgesic drugs

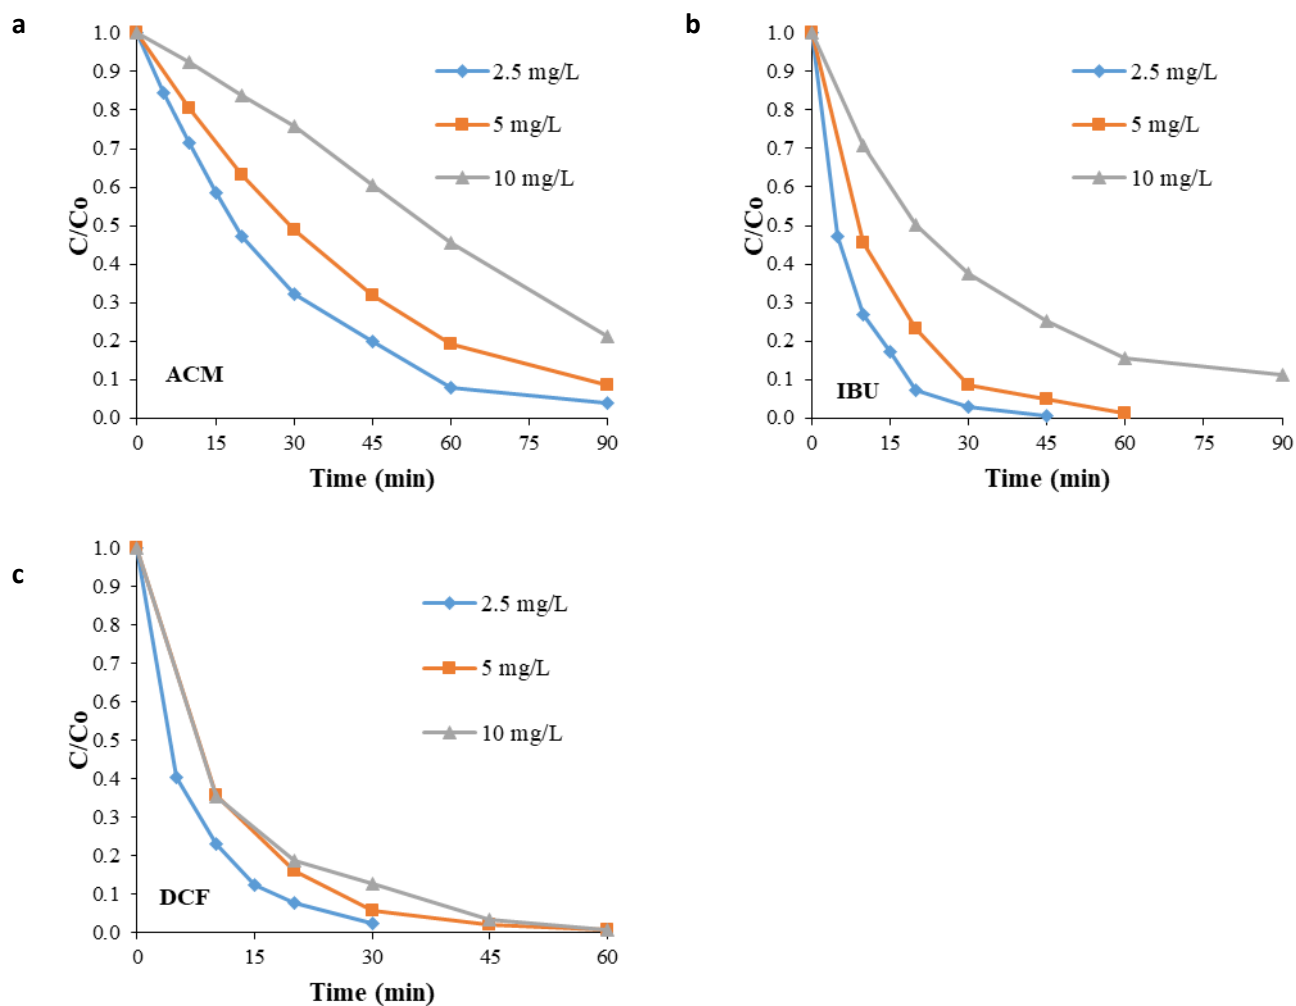

S1. Effect of drug concentration ( $C(\text{PEF/TiO}_2 \text{ 20 wt\%}) = 600 \text{ mg L}^{-1}$ ); (a)ACM; (b) IBU; (c) DCF.

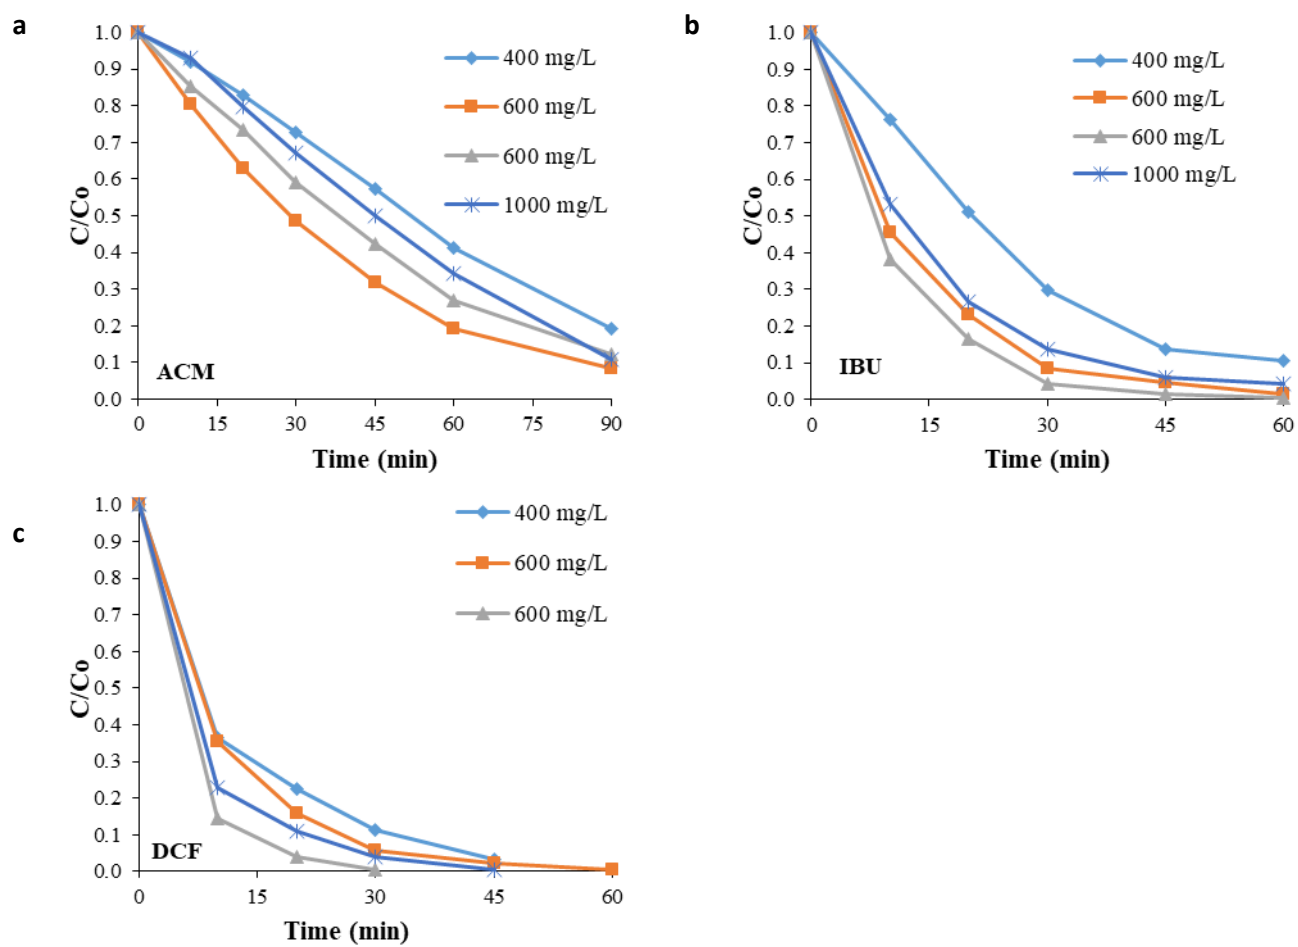

S2. The effect PEF/TiO<sub>2</sub> 20 wt% loading ( $C_0(\text{drug})=5 \text{ mg L}^{-1}$ ); (a)ACM; (b) IBU; (c) DCF.

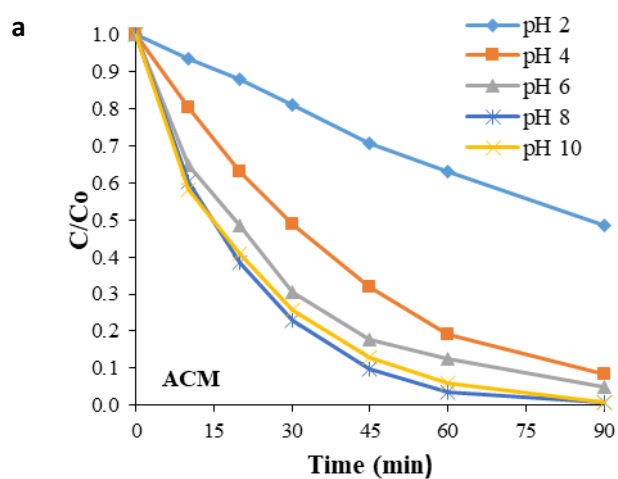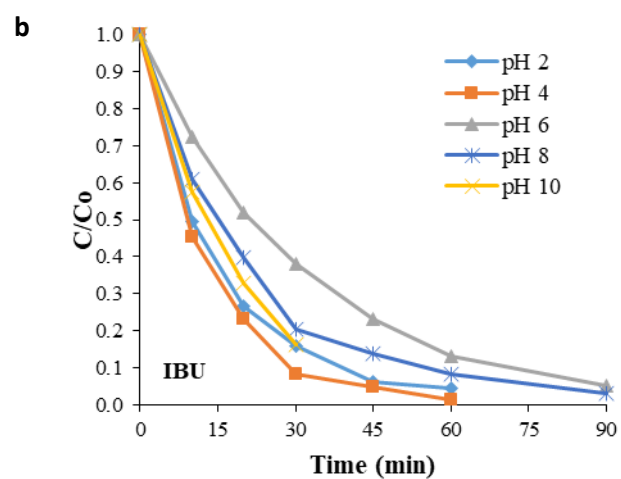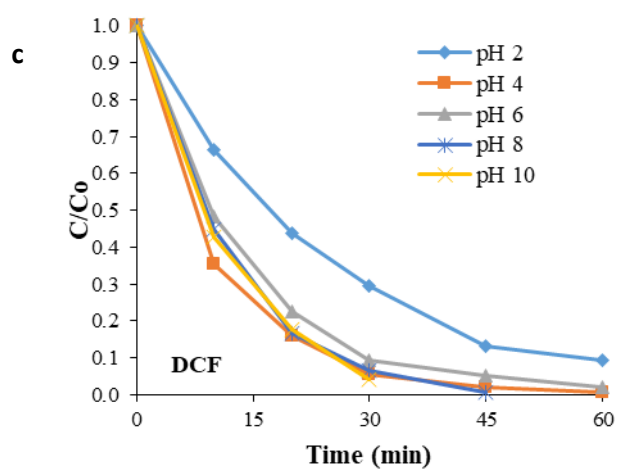

S3. Effect of pH, during photocatalytic treatment ( $C_o(\text{drug})=5 \text{ mg L}^{-1}$ ,  $C((\text{PEF}/\text{TiO}_2 \text{ 20wt \%}))=600 \text{ mg L}^{-1}$ ); (a)ACM; (b) IBU; (c) DCF.
